# Supplementary material for: Microscopic Pore Structure Characteristics and Methane Adsorption of Vitrain and Durain
Source: Hindawi journal article supplement (doi:10.1155/2020/8887230), 2020-11-22
Supplement: f1 [file 8887230.f1.docx]

**Concise description**

**The experimental methods and all the experimental data in the study are listed in the supplementary material.**

**Table S1**

Experimental analysis analyzer and purpose of the vitrain and durain.

| No. | Analysis method | Instrument | Test item |
| --- | --- | --- | --- |
| 1 | Proximate analysis | XL-2000 Automatic analyzer | Moisture(*M*ad), ash(*A*d), Volatile(*V*ad),  Fixed carbon(*FC*ad) |
| 2 | Maceral analysis | Leitz ORTHOLUX-ⅡPOL BK | Maceral Group |
| 3 | Vitrinite reflectance (*R*O) | Leitz ORTHOPLAN microscope | Organic matter maturity of coal |
| 4 | Scanning electron microscopy  (SEM) | FEI Quanta 400 FEG,  Field emission environment  scanning electron microscope | Characteristics of micro-scale pore of coal |
| 5 | Mercury intrusion | Auto Pore 9505 mercury porosimeter | PV, SSA and  PSD, Macropore (>50 nm) |
| 6 | N2 absorption  at low temperature | ASAP2460 SSA and pore size analyzer | PV, SSA and  PSD, Mesopore (2-50 nm) |
| 7 | CO2 absorption  at low temperature | ASAP2460 SSA and pore size analyzer | PV, SSA and  PSD, Micropore (<2 nm) |
| 8 | CH4 adsorption- desorption | GAI-100 gas isotherm adsorption analyzer | Methane adsorption and desorption capacity of coal |

**Table S2**

Proximate analysis and maceral analysis of vitrain and durain

| Sample No. | Macroscopic constituents of coal | Proximate analysis (%) | | | | Maceral analysis (%) | | | *R*O (%) |
| --- | --- | --- | --- | --- | --- | --- | --- | --- | --- |
| *M*ad | *A*d | *V*ad | *FC*ad | Vitrinite | Exinite | Inertinite |
| 1#-A | durain | 5.24 | 8.19 | 36.74 | 49.83 | 26.7 | 2.2 | 67.3 | 0.49 |
| 1#-J | vitrain | 7.48 | 3.07 | 48.89 | 40.56 | 78.6 | 3.2 | 16.8 | 0.54 |
| 2#-A | durain | 4.79 | 4.98 | 31.86 | 58.37 | 31.7 | 1.4 | 63.9 | 0.55 |
| 2#-J | vitrain | 4.82 | 3.11 | 58.37 | 33.70 | 82.0 | 17.0 | 0.6 | 0.55 |
| 3#-A | durain | 5.83 | 6.73 | 27.16 | 60.28 | 11.6 | 3.9 | 82.5 | 0.65 |
| 3#-J | vitrain | 3.64 | 1.16 | 33.50 | 61.70 | 64.9 | 1.0 | 33.1 | 0.69 |

*P*d- displacement pressure, *R*- average of pore throat radius, *S*Hg- Maximum mercury saturation, *S*k- Skewness, *φ*-Structural coefficient, *S*p- Sorting coefficient of throats, SSA- SSA, PV- PV.

**Table S3**

PV and SSA distribution during liquid N2 adsorption

| Sample No. | Averaged  Pore Size  (nm) | DFT  SSA(m2/g) | SSA distribution (%) | | | DFT  PV(cm3/g) | PV distribution (%) | | |
| --- | --- | --- | --- | --- | --- | --- | --- | --- | --- |
| <2nm | 2-50nm | >50nm | <2nm | 2-50nm | >50nm |
| 1#-A | 6.79 | 3.48 | 7.1 | 77.4 | 15.5 | 0.00901 | 24.1 | 62.6 | 13.3 |
| 1#-J | 4.77 | 1.99 | 25.6 | 63.0 | 11.3 | 0.00360 | 11.1 | 83.3 | 5.6 |
| 2#-A | 7.26 | 5.02 | 44.5 | 18.3 | 37.2 | 0.00756 | 19.6 | 63.3 | 17.1 |
| 2#-J | 5.13 | 2.45 | 84.0 | 15.2 | 0.8 | 0.00391 | 34.3 | 44.2 | 21.5 |
| 3#-A | 11.30 | 2.67 | 15.0 | 44.4 | 40.6 | 0.00850 | 3.6 | 72.9 | 23.5 |
| 3#-J | 5.99 | 1.29 | 18.5 | 75.1 | 6.4 | 0.00340 | 5.9 | 79.4 | 14.7 |

**Table S4**

Micropore size, volume, and SSA during CO2 adsorption

| Sample No. | DFT micropore size  (nm) | DFT PV  (cm3/g) | DFT SSA  (m2/g) |
| --- | --- | --- | --- |
| 1#-A | 0.4976 | 0.01991 | 124.937 |
| 1#-J | 0.5032 | 0.02000 | 125.404 |
| 2#-A | 0.6504 | 0.02528 | 140.593 |
| 2#-J | 0.6619 | 0.02609 | 150.730 |
| 3#-A | 0.6330 | 0.01846 | 102.898 |
| 3#-J | 0.6476 | 0.02916 | 195.631 |

**Table S5**

Fitting parameters of the adsorption and desorption data

| Sample  No. | Adsorption data | | Desorption data | | | | Theoretical desorption rate | Recovery ratio |
| --- | --- | --- | --- | --- | --- | --- | --- | --- |
| VL/cm3·t-1 | PL/MPa | VL/cm3·t-1 | PL/MPa | C/cm3·t-1 | Cdes/cm3·t-1 | R1/% | R2/% |
| 1#-A | 6.762 | 2.504 | 4.557 | 2.428 | 1.661 | 2.681 | 63.551 | 41.172 |
| 1#-J | 8.534 | 2.499 | 7.079 | 2.891 | 1.363 | 2.709 | 80.746 | 61.729 |
| 2#-A | 11.443 | 2.463 | 8.631 | 2.672 | 2.294 | 4.086 | 73.421 | 51.724 |
| 2#-J | 14.887 | 2.425 | 12.835 | 2.538 | 1.743 | 4.518 | 86.420 | 80.226 |
| 3#-A | 21.945 | 4.201 | 15.327 | 3.756 | 4.066 | 6.474 | 73.472 | 57.762 |
| 3#-J | 24.498 | 4.203 | 22.812 | 3.372 | 0.308 | 4.230 | 98.650 | 81.459 |

**Table S6**

Pore parameters of full pore diameter section of vitrain and durain

| Sample  No. | SSA (m2/g) | | | PV (cm3/g) | | |
| --- | --- | --- | --- | --- | --- | --- |
| Micropore | Mesopore | Macropore | Micropore | Mesopore | Macropore |
| 1#-A | 126.24(93.19%) | 2.26(1.66%) | 6.97(5.15%) | 0.0206(20.33%) | 0.0072(7.05%) | 0.0737(72.62%) |
| 1#-J | 124.97(97.69%) | 1.26(0.98%) | 1.70(1.33%) | 0.0203(45.78%) | 0.0030(6.82%) | 0.0210(47.40%) |
| 2#-A | 142.83(98.07%) | 0.92(0.63%) | 1.90(1.30%) | 0.0267(49.31%) | 0.0048(8.82%) | 0.0227(41.87%) |
| 2#-J | 152.92(99.33%) | 0.24(0.16%) | 0.79(0.51%) | 0.0276(72.17%) | 0.0016(4.19%) | 0.0090(23.64%) |
| 3#-A | 103.30(96.97%) | 1.18(1.11%) | 2.05(1.93%) | 0.0188(33.48%) | 0.0061(10.95%) | 0.0312(55.57%) |
| 3#-J | 195.63(98.91%) | 0.89(0.45%) | 1.27(0.64%) | 0.0292(65.98%) | 0.0027(6.03%) | 0.0124(27.99%) |
